# Supplementary material for: GAIN2 trial overall survival with intense versus tailored dose dense chemotherapy in early breast cancer
Source: PubMed Central journal article supplement (PMC11289103; doi:10.1038/s41523-024-00675-x), 2024-07-30
Supplement: 41523_2024_675_MOESM1_ESM.pdf [file 41523_2024_675_MOESM1_ESM.pdf]

**Supplementary information**

**Supplementary Figure 1: Consort diagram (whole study population)**

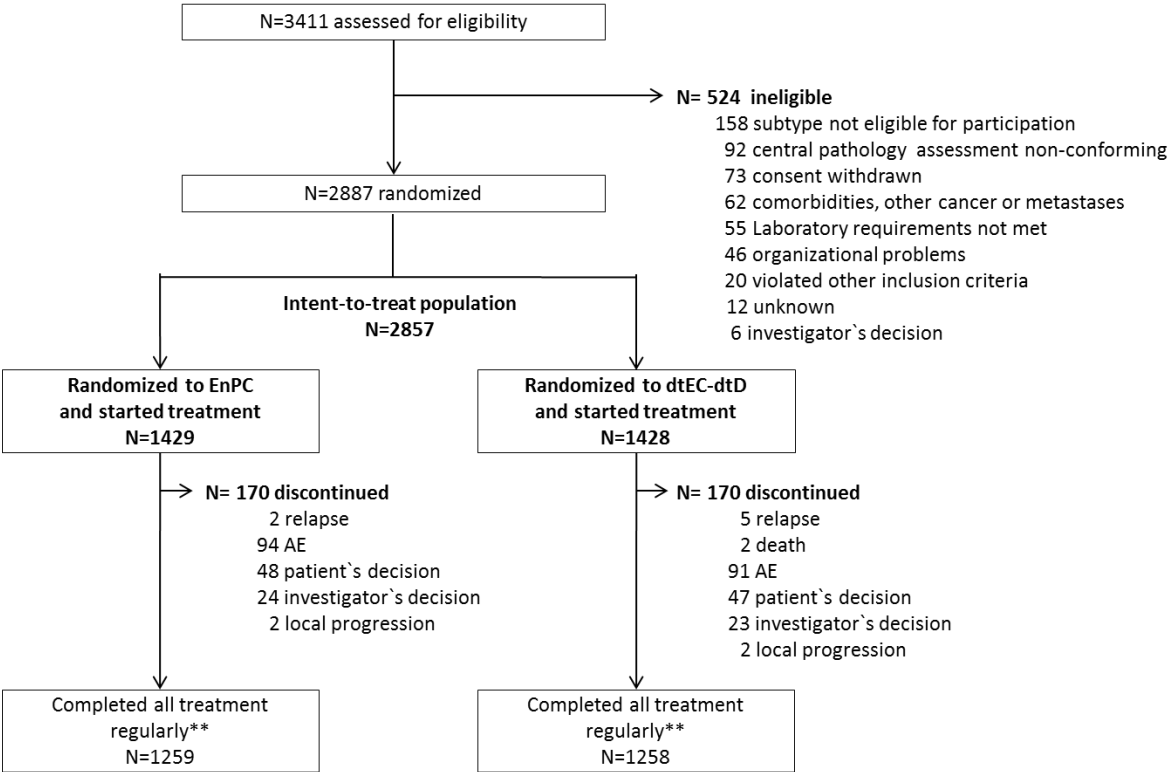

**Supplementary Figure 2: Subgroup analysis of OS, entire cohort (univariate Cox regression model)**

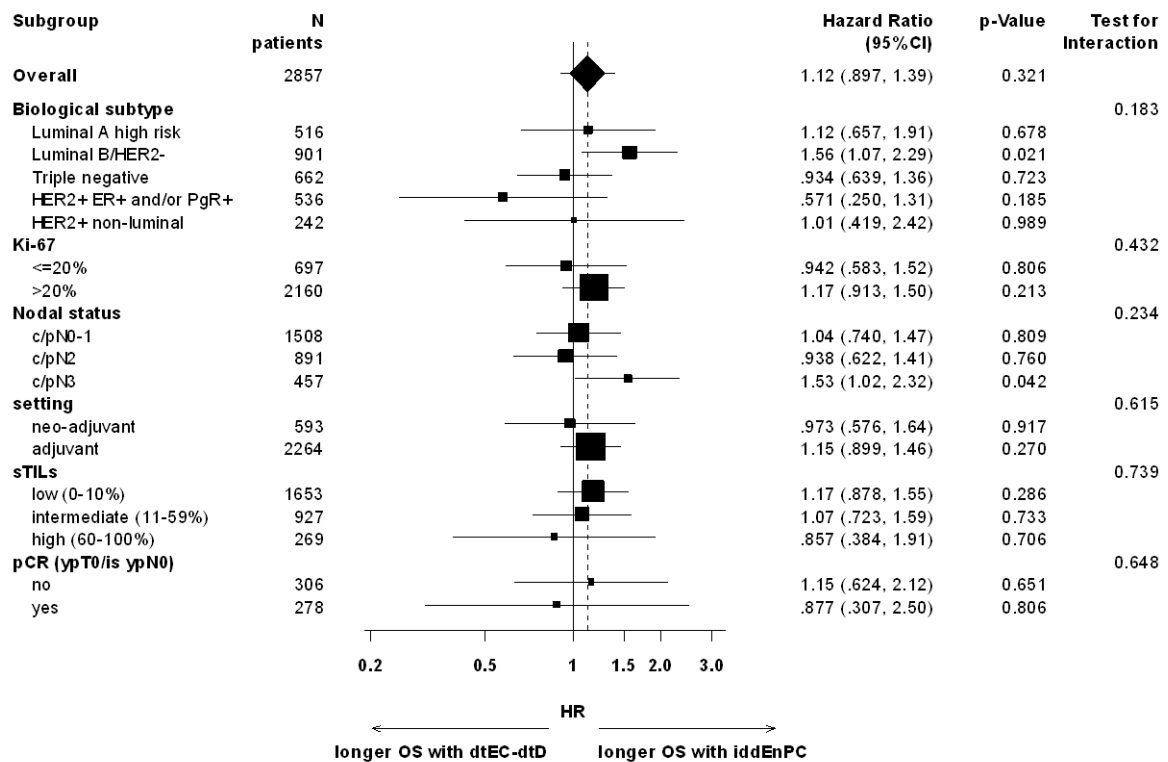

**Supplementary Figure 3:** Comparison of short-term treatment efficacy (ypT0/is ypN0) according to stratified and prospectively defined subgroups

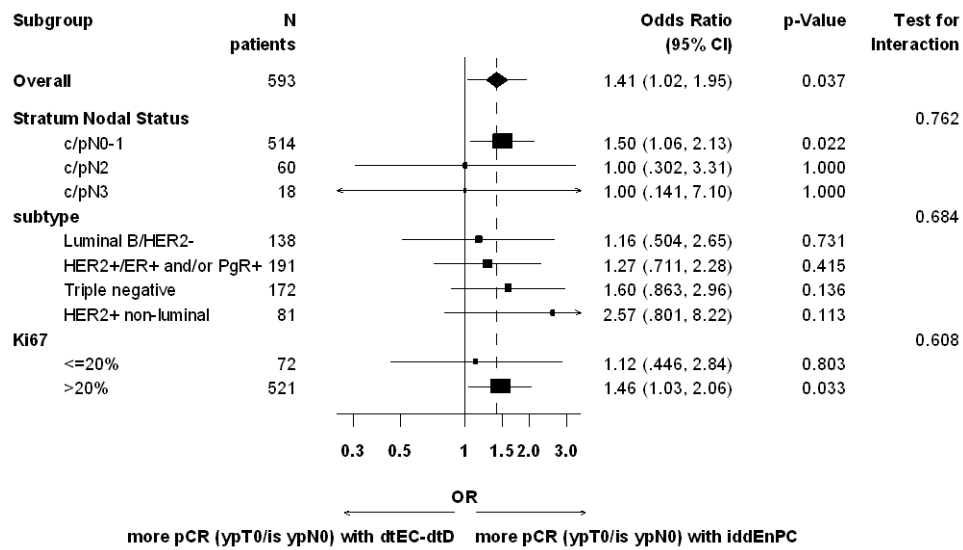

**Supplemental Figure 4:** Kaplan-Meier curves for iDFS rates among patients treated in the (A) neoadjuvant and (B) adjuvant settings, stratified according to tumor subtypes

(A)

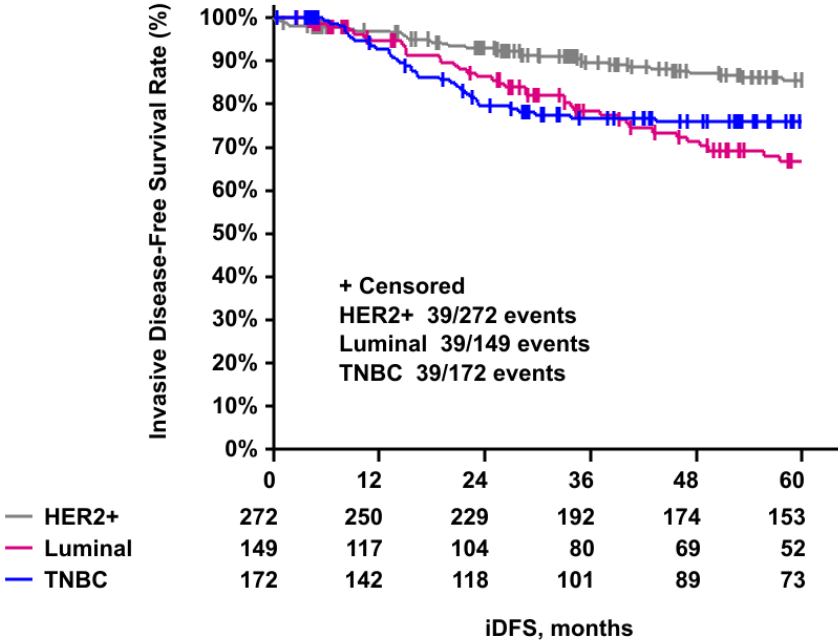

(B)

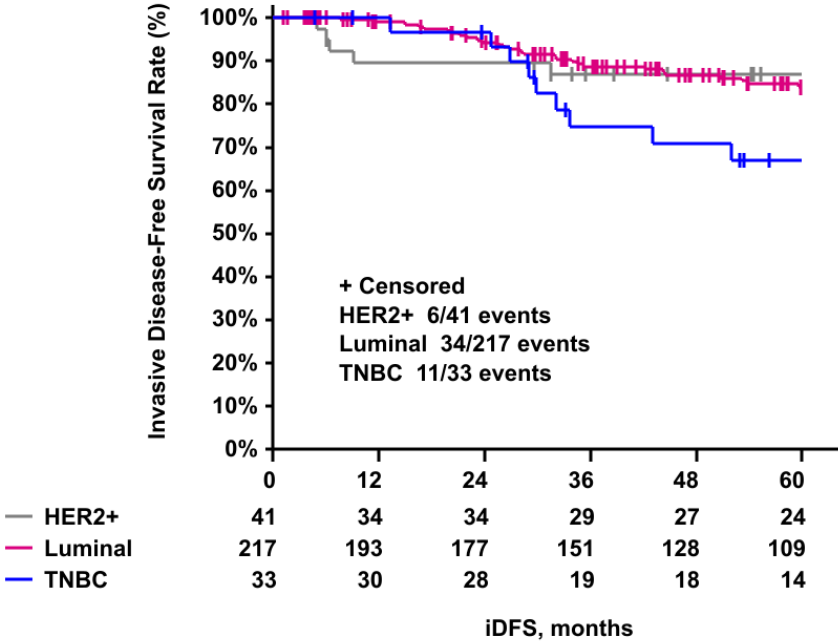

**Supplemental Figure 5:** Kaplan-Meier curves for OS rates among patients treated in the **(A)** neoadjuvant and **(B)** adjuvant settings, stratified according to tumor subtypes

**(A)**

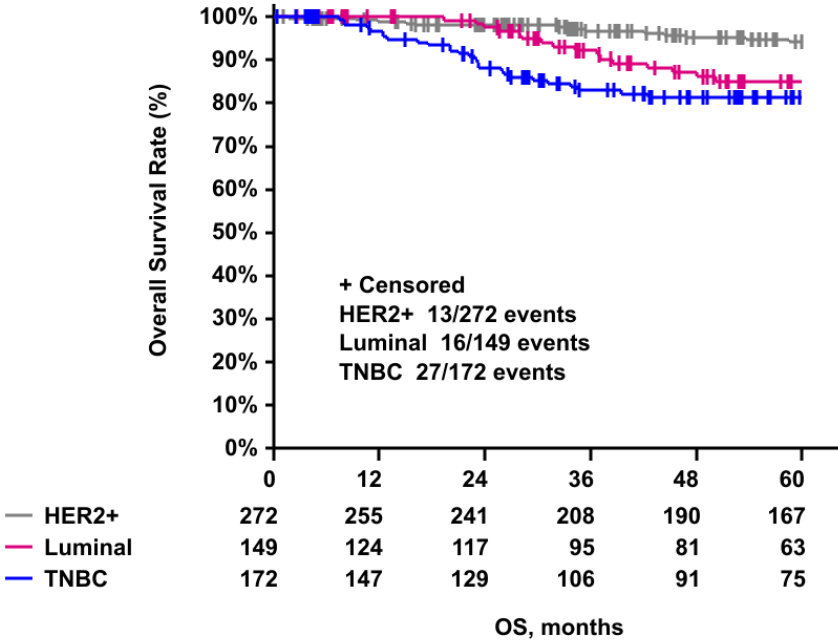

**(B)**

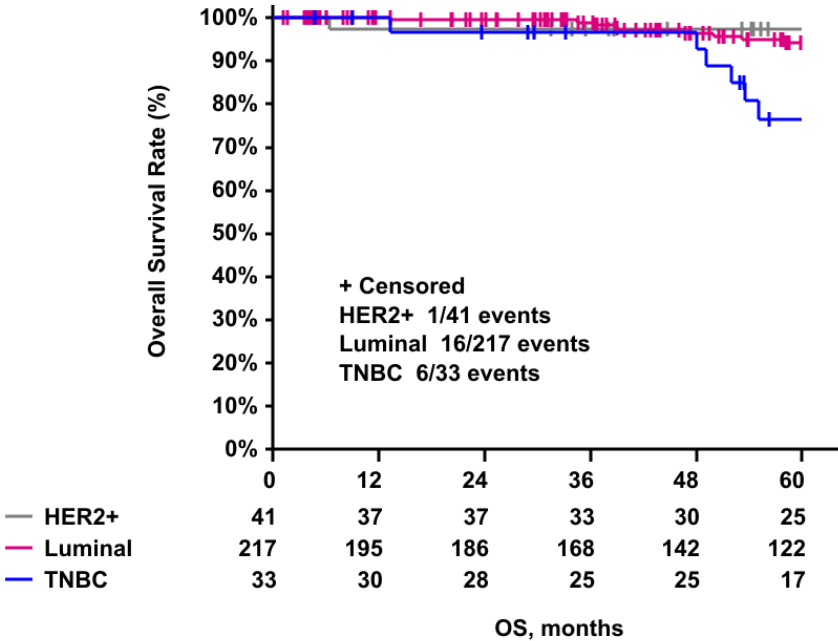

**Supplementary Figure 6:** Forest plot of multivariate Cox regression for OS (cohort of patients included after the third amendment)

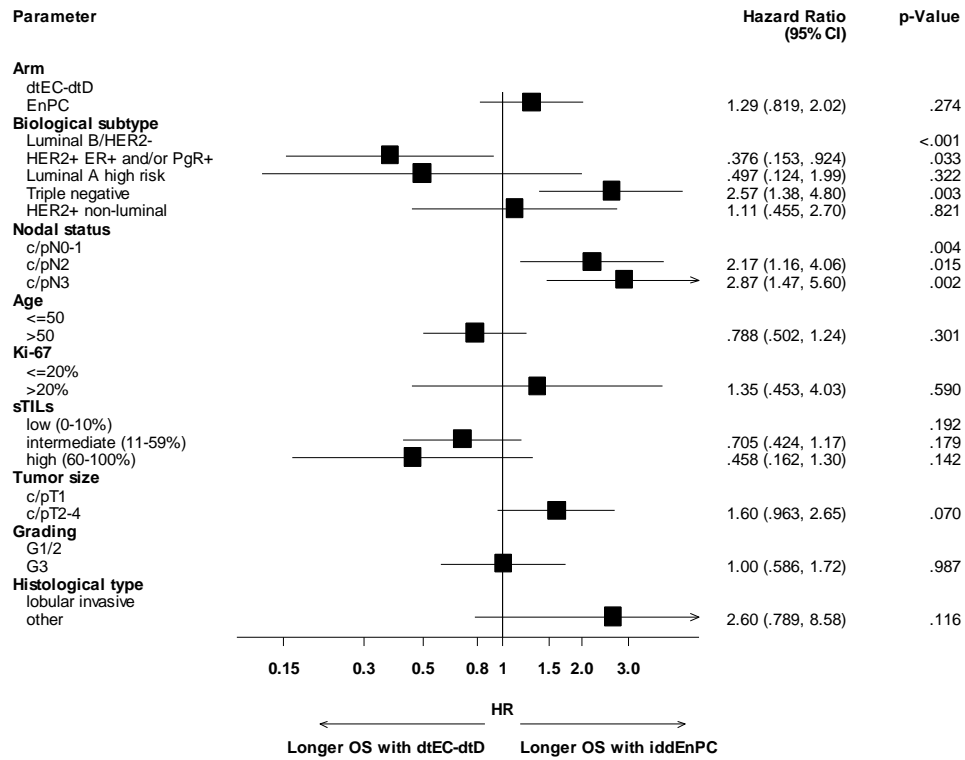

**Supplementary Figure 7:** Forest plot of multivariate Cox regression for iDFS (cohort of patients included after the third amendment)

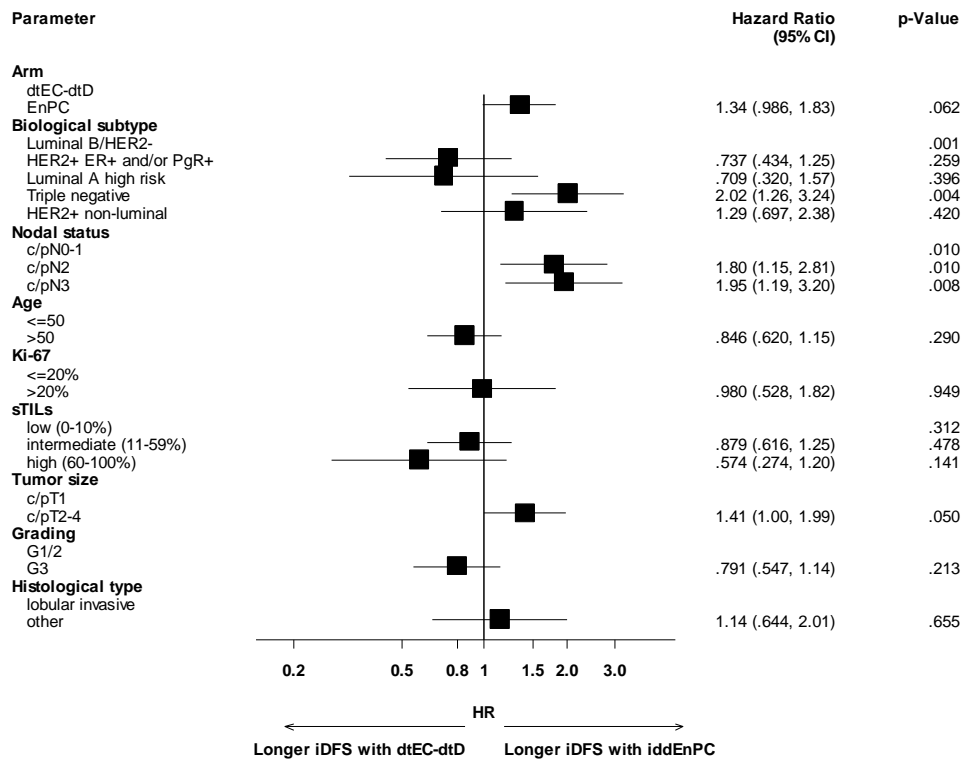

## Supplementary Figure 8: Study Design

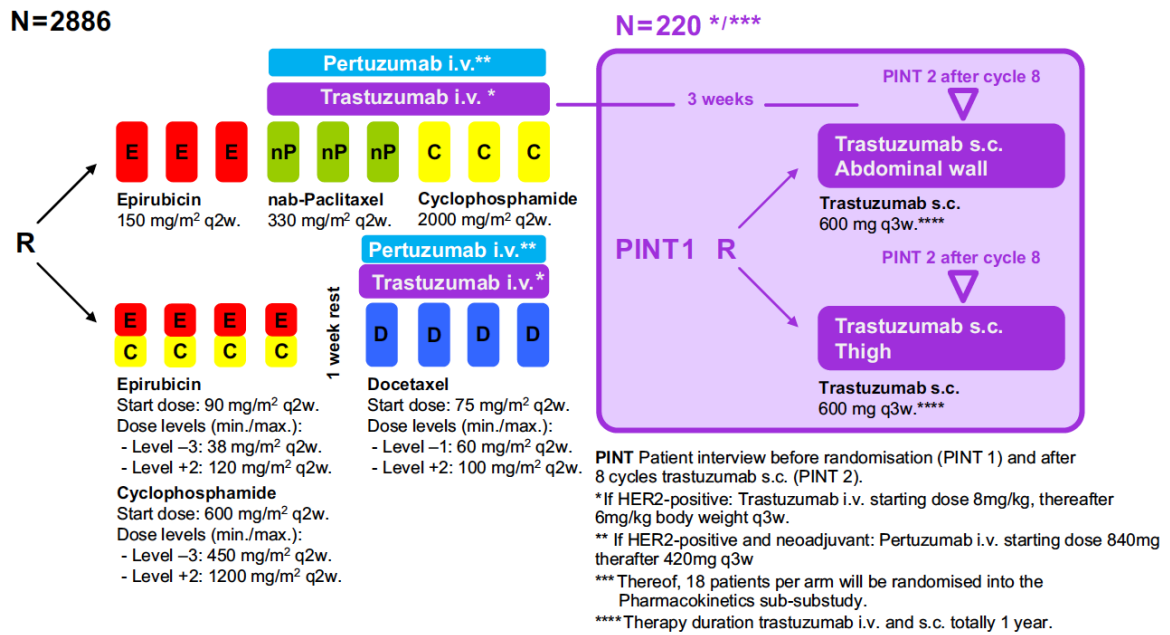

Note: It was initially planned to enroll 2,886 patients; at the end, 2,887 patients were randomized.



**Supplementary Table 1:** Baseline characteristics (neoadjuvant vs. adjuvant settings, all patients)

| Parameter          |                      | Neoadjuvant<br>N=593 N (%) | Adjuvant<br>N=2264<br>N (%) | Overall<br>N=2857<br>N (%) | p-value |
|--------------------|----------------------|----------------------------|-----------------------------|----------------------------|---------|
| Menopausal status  | premenopausal        | 338 (57.0)                 | 1140 (50.4)                 | 1478 (51.7)                | 0.004   |
|                    | postmenopausal       | 255 (43.0)                 | 1124 (49.6)                 | 1379 (48.3)                |         |
| Karnofsky index    | Karnofsky 100%       | 536 (90.4)                 | 1861 (82.2)                 | 2397 (83.9)                | <0.001  |
| Tumor stage (all)  | c/pT1                | 224 (37.8)                 | 826 (36.5)                  | 1,050 (36.8)               | <0.001  |
|                    | c/pT2                | 312 (52.7)                 | 1,105 (48.8)                | 1,417 (49.6)               |         |
|                    | c/pT3                | 25 (4.2)                   | 291 (12.9)                  | 316 (11.1)                 |         |
|                    | c/pT4                | 31 (5.2)                   | 42 (1.9)                    | 73 (2.6)                   |         |
| Nodal status (all) | c/pN0-1              | 514 (86.8)                 | 994 (43.9)                  | 1,508 (52.8)               | <0.001  |
|                    | c/pN2                | 60 (10.1)                  | 831 (36.7)                  | 891 (31.2)                 |         |
|                    | c/pN3                | 18 (3.0)                   | 439 (19.4)                  | 457 (16.0)                 |         |
| ER/PgR*            | ER/PR +              | 340 (57.3)                 | 1,613 (71.2)                | 1,953 (68.4)               | <0.001  |
|                    | ER/PgR-              | 253 (42.7)                 | 651 (28.8)                  | 904 (31.6)                 |         |
| Subtype            | Luminal A high-risk  | 11 (1.9)                   | 505 (22.3)                  | 516 (18.1)                 | <0,001  |
|                    | Luminal B            | 138 (23.3)                 | 763 (33.7)                  | 901 (31.5)                 |         |
|                    | TNBC                 | 172 (29.0)                 | 490 (21.6)                  | 662 (23.2)                 |         |
|                    | HER2+ and/or ER/PgR+ | 191 (32.2)                 | 345 (15.2)                  | 536 (18.8)                 |         |
|                    | HER2+/HR-            | 81 (13.7)                  | 161 (7.1)                   | 242 (8.5)                  |         |

|                         |                 |            |              |              |        |
|-------------------------|-----------------|------------|--------------|--------------|--------|
| HER2 central            | positive        | 272 (45.9) | 506 (22.3)   | 778 (27.2)   | <0,001 |
|                         | negative        | 321 (54.1) | 1,758 (77.7) | 2,079 (72.8) |        |
| Tumor grading           | G1              | 6 (1.0)    | 49 (2.2)     | 55 (1.9)     | <0.001 |
|                         | G2              | 215 (36.3) | 1,027 (45.4) | 1,242 (43.5) |        |
|                         | G3              | 372 (62.7) | 1,188 (52.5) | 1,560 (54.6) |        |
| Ki67 central            | <=20%           | 72 (12.1)  | 625 (27.6)   | 697 (24.4)   | <0.001 |
|                         | >20%            | 521 (87.9) | 1,639 (72.4) | 2,160 (75.6) |        |
| IHC4+C-score, quartiles | IHC4+C-score Q1 | 100 (29.6) | 10 (9.6)     | 110 (24.9)   | <0.001 |
|                         | IHC4+C-score Q2 | 92 (27.2)  | 19 (18.3)    | 111 (25.1)   |        |
|                         | IHC4+C-score Q3 | 80 (23.7)  | 31 (29.8)    | 111 (25.1)   |        |
|                         | IHC4+C-score Q4 | 66 (19.5)  | 44 (42.3)    | 110 (24.9)   |        |

*\*Central pathology, preferably based on surgical tissue (for adjuvant patients) or from core biopsy (for neoadjuvant patients), and if not available, then from local pathology.*

**Supplementary Table 2:** Multivariable logistic regression analysis for pCR (ypT0/is ypN0) adjusted for stratification factors

| Parameter           | Category                         | OR   | 95% CI       | p-value              |
|---------------------|----------------------------------|------|--------------|----------------------|
| <b>Arm</b>          | dtEC-dtD                         |      |              |                      |
|                     | iddEnPC                          | 1.48 | (1.03, 2.12) | 0.033                |
| <b>Subtype</b>      | Luminal B/HER2-                  |      |              | <0.001 <sup>##</sup> |
|                     | HER2+/ER+ and/or PgR+            | 5.82 | (3.47, 9.75) | <0.001               |
|                     | Luminal A high risk <sup>#</sup> | n.a. | n.a.         | n.a.                 |
|                     | Triple negative                  | 2.43 | (1.44, 4.10) | <0.001               |
|                     | HER2+ non-luminal                | 15.5 | (7.73, 31.0) | <0.001               |
| <b>Nodal status</b> | cN0-1                            |      |              | 0.228 <sup>##</sup>  |
|                     | cN2                              | 0.58 | (0.28, 1.19) | 0.135                |
|                     | cN3                              | 1.50 | (0.53, 4.20) | 0.443                |

CI = confidence interval; iddEnPC = intense dose-dense Epirubicin, nab-Paclitaxel, Cyclophosphamide; dtEC-dtD = dose-dense, dose-tailored Epirubicin/Cyclophosphamide - dose-dense, dose-tailored Docetaxel; mITT = modified intent-to-treat; pCR = pathological complete response; OR = odds ratio; ER = estrogen receptor; PgR = progesterone receptor.

Global p-value given in row "Subtype Luminal B/HER2-" and "Nodal status cN0-1"

<sup>#</sup> procedure not attainable as all patients (N=11) fall into same category (no pCR)

<sup>##</sup> global p-value

### **Supplementary Note**

An IHC4+C like score was determined in HR-positive patients according to Cuzick et al [1] as the sum of the immunohistochemical (IHC) score and a clinical score.

According to [1], the IHC score was computed by the following formula:

$$\text{IHC4} = 94.7 [-0.1 \text{ER}_{10} - 0.079 \text{PgR}_{10} + 0.586 \text{HER2} + 0.24 \ln(1 + 10 \text{Ki67})]$$

where IHC4 includes the four IHC markers

- $\text{ER}_{10}$  (H score, defined as the percentage of cells staining weakly + two times the percentage of cells staining moderately + three times the percentage of cells staining strongly divided by 30 to obtain a variable with range 0-10); here,  $\text{ER}_{10}$  was replaced by the percentage of cells staining positive/10 (positive, if  $\text{ER} > 10\%$ )
- $\text{PgR}_{10}$  (percentage of cells staining positive/10 (positive, if  $\text{PgR} > 10\%$ ))
- HER2 (3+: positive; 0,1+,2+: negative; 2+ equivocal: FISH->positive if the ratio was  $> 2$ )
- Ki67 (percentage of positive staining malignant cells)

Further, the clinical score given in [1] was adjusted by

$$\text{Clinical score} = 100 [0.417 \text{N}_{1-3} + 1.566 \text{N}_4 + 0.93 (0.497 \text{T}_{1-2} + 0.882 \text{T}_{2-5} + 1.838 \text{T}_{>5} + 0.559 \text{Gr}_2 + 0.97 \text{Gr}_3 + 0.13 \text{Age})]$$

with the variables

- nodal status ( $\text{N}_{1-3}$ ,  $\text{N}_4$ ),
- tumor stage ( $\text{T}_{1-2}$ ,  $\text{T}_{2-5}$ ,  $\text{T}_{>5}$ ) (instead of using the classification of the tumor stage as in [1]:  $\text{T}_{1-2}$ ,  $\text{T}_{2-3}$ ,  $\text{T}_{>3}$ ),
- local grading ( $\text{Gr}_2$ ,  $\text{Gr}_3$ ) and
- age.

The factor 'anastrozole' as given in the formula in [1] had to be omitted, because the variable was not available in GAIN-2 patients.

The IHC4+C- score was analyzed in risk groups, categorized in quartiles (Q) as follows:

- $\text{Q1} < 25\%$
- $\text{Q2} \geq 25\%$  and  $< 50\%$
- $\text{Q3} \geq 50\%$  and  $< 75\%$
- $\text{Q4} \geq 75\%$

### **Supplementary References**

- [1] J. Cuzick, M. Dowsett, S. Pineda, et al. Prognostic value of a combined estrogen receptor, progesterone receptor, Ki-67, and human epidermal growth factor 2 immunohistochemical score and comparison with the genomic health recurrence score in early breast cancer. *J Clin Oncol* 29 (32): 4273-79, 10 Nov 2011.

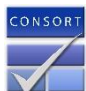

## CONSORT 2010 checklist of information to include when reporting a randomised trial\*

| Section/Topic                         | Item No                          | Checklist item                                                                                                                           | Reported on page No                                                                                                                                                                         |
|---------------------------------------|----------------------------------|------------------------------------------------------------------------------------------------------------------------------------------|---------------------------------------------------------------------------------------------------------------------------------------------------------------------------------------------|
| <b>Title and abstract</b>             |                                  |                                                                                                                                          |                                                                                                                                                                                             |
|                                       | 1a                               | Identification as a randomised trial in the title                                                                                        | -                                                                                                                                                                                           |
|                                       | 1b                               | Structured summary of trial design, methods, results, and conclusions (for specific guidance see CONSORT for abstracts)                  | 5                                                                                                                                                                                           |
| <b>Introduction</b>                   |                                  |                                                                                                                                          |                                                                                                                                                                                             |
| Background and objectives             | 2a                               | Scientific background and explanation of rationale                                                                                       | 6-7                                                                                                                                                                                         |
|                                       | 2b                               | Specific objectives or hypotheses                                                                                                        | 7                                                                                                                                                                                           |
| <b>Methods</b>                        |                                  |                                                                                                                                          |                                                                                                                                                                                             |
| Trial design                          | 3a                               | Description of trial design (such as parallel, factorial) including allocation ratio                                                     | 18                                                                                                                                                                                          |
|                                       | 3b                               | Important changes to methods after trial commencement (such as eligibility criteria), with reasons                                       | 18                                                                                                                                                                                          |
| Participants                          | 4a                               | Eligibility criteria for participants                                                                                                    | 18-19                                                                                                                                                                                       |
|                                       | 4b                               | Settings and locations where the data were collected                                                                                     | 18                                                                                                                                                                                          |
| Interventions                         | 5                                | The interventions for each group with sufficient details to allow replication, including how and when they were actually administered    | 19                                                                                                                                                                                          |
| Outcomes                              | 6a                               | Completely defined pre-specified primary and secondary outcome measures, including how and when they were assessed                       | 19-20                                                                                                                                                                                       |
|                                       | 6b                               | Any changes to trial outcomes after the trial commenced, with reasons                                                                    | 18                                                                                                                                                                                          |
| Sample size                           | 7a                               | How sample size was determined                                                                                                           | Ref. 18                                                                                                                                                                                     |
|                                       | 7b                               | When applicable, explanation of any interim analyses and stopping guidelines                                                             | N.A.                                                                                                                                                                                        |
| Randomisation:<br>Sequence generation | 8a                               | Method used to generate the random allocation sequence                                                                                   | Ref. 18                                                                                                                                                                                     |
|                                       | 8b                               | Type of randomisation; details of any restriction (such as blocking and block size)                                                      | Ref. 18                                                                                                                                                                                     |
|                                       | Allocation concealment mechanism | 9                                                                                                                                        | Mechanism used to implement the random allocation sequence (such as sequentially numbered containers), describing any steps taken to conceal the sequence until interventions were assigned |
| 10                                    |                                  | Who generated the random allocation sequence, who enrolled participants, and who assigned participants to interventions                  | Ref. 18                                                                                                                                                                                     |
| Blinding                              | 11a                              | If done, who was blinded after assignment to interventions (for example, participants, care providers, those assessing outcomes) and how | N.A.                                                                                                                                                                                        |
|                                       | 11b                              | If relevant, description of the similarity of interventions                                                                              | 10                                                                                                                                                                                          |
| Statistical methods                   | 12a                              | Statistical methods used to compare groups for primary and secondary outcomes                                                            | 20, Ref. 18                                                                                                                                                                                 |

|                                                      |     |                                                                                                                                                   |                   |
|------------------------------------------------------|-----|---------------------------------------------------------------------------------------------------------------------------------------------------|-------------------|
|                                                      | 12b | Methods for additional analyses, such as subgroup analyses and adjusted analyses                                                                  | 20                |
| <b>Results</b>                                       |     |                                                                                                                                                   |                   |
| Participant flow (a diagram is strongly recommended) | 13a | For each group, the numbers of participants who were randomly assigned, received intended treatment, and were analysed for the primary outcome    | 8, Fig. 1         |
| Recruitment                                          | 13b | For each group, losses and exclusions after randomisation, together with reasons                                                                  | Fig. 1            |
|                                                      | 14a | Dates defining the periods of recruitment and follow-up                                                                                           | Ref. 18           |
|                                                      | 14b | Why the trial ended or was stopped                                                                                                                | N.A.              |
| Baseline data                                        | 15  | A table showing baseline demographic and clinical characteristics for each group                                                                  | Table 1           |
| Numbers analysed                                     | 16  | For each group, number of participants (denominator) included in each analysis and whether the analysis was by original assigned groups           | 8, Fig. 1         |
| Outcomes and estimation                              | 17a | For each primary and secondary outcome, results for each group, and the estimated effect size and its precision (such as 95% confidence interval) | 8-11              |
|                                                      | 17b | For binary outcomes, presentation of both absolute and relative effect sizes is recommended                                                       | 9                 |
| Ancillary analyses                                   | 18  | Results of any other analyses performed, including subgroup analyses and adjusted analyses, distinguishing pre-specified from exploratory         | 10-11, Supplement |
| Harms                                                | 19  | All important harms or unintended effects in each group (for specific guidance see CONSORT for harms)                                             | Ref. 18           |
| <b>Discussion</b>                                    |     |                                                                                                                                                   |                   |
| Limitations                                          | 20  | Trial limitations, addressing sources of potential bias, imprecision, and, if relevant, multiplicity of analyses                                  | 16                |
| Generalisability                                     | 21  | Generalisability (external validity, applicability) of the trial findings                                                                         | 16                |
| Interpretation                                       | 22  | Interpretation consistent with results, balancing benefits and harms, and considering other relevant evidence                                     | 12-17             |
| <b>Other information</b>                             |     |                                                                                                                                                   |                   |
| Registration                                         | 23  | Registration number and name of trial registry                                                                                                    | 18                |
| Protocol                                             | 24  | Where the full trial protocol can be accessed, if available                                                                                       | 22                |
| Funding                                              | 25  | Sources of funding and other support (such as supply of drugs), role of funders                                                                   | 23                |

Citation: Schulz KF, Altman DG, Moher D, for the CONSORT Group. CONSORT 2010 Statement: updated guidelines for reporting parallel group randomised trials. BMC Medicine. 2010;8:18. © 2010 Schulz et al. This is an Open Access article distributed under the terms of the Creative Commons Attribution License (<http://creativecommons.org/licenses/by/2.0>), which permits unrestricted use, distribution, and reproduction in any medium, provided the original work is properly cited.

\*We strongly recommend reading this statement in conjunction with the CONSORT 2010 Explanation and Elaboration for important clarifications on all the items. If relevant, we also recommend reading CONSORT extensions for cluster randomised trials, non-inferiority and equivalence trials, non-pharmacological treatments, herbal interventions, and pragmatic trials. Additional extensions are forthcoming: for those and for up-to-date references relevant to this checklist, see [www.consort-statement.org](http://www.consort-statement.org).
